Running head: HOW DO TEACHERS CHOOSE CONTENT FOR TEACHING?

1

2

3 **Teachers' choice of content and consideration of controversial and sensitive**  
4 **issues in teaching of secondary school genetics**

5

6

7 Tuomas Aivelo<sup>1,\*</sup>, Anna Uitto<sup>2</sup>

8 1: Faculty of Biological and Environmental Sciences, University of Helsinki

9 2: Faculty of Educational Sciences, University of Helsinki

10 \* Corresponding author: [tuomas.aivelo@helsinki.fi](mailto:tuomas.aivelo@helsinki.fi)

11

12 **Disclosure statement**

13 Tuomas Aivelo has participated in writing biology textbooks for upper-secondary school  
14 biology for eOppi Oy. None of the teachers involved in this study used biology textbooks  
15 from eOppi Oy.

16

17

## HOW DO TEACHERS CHOOSE CONTENT FOR TEACHING?

### 18 **Abstract**

19 Science education strives to increase interest in science and facilitate active citizenship. Thus,  
20 the aspects of personal and societal relevance are increasingly emphasised in science  
21 curricula. Still, little is known about how teachers choose content for their teaching, although  
22 their choices translate curricula to teaching practice. We explored how teachers choose  
23 genetics content and contexts for biology courses on cells, heredity, and biotechnology by  
24 interviewing ten Finnish upper-secondary school teachers. We specifically studied how the  
25 teachers described teaching on genetically modified organisms, hereditary disorders, and  
26 human traits as teachers have different amounts of freedom in choosing contents and contexts  
27 in these themes. We analysed interviews with theory-guiding content analysis and found  
28 consistent patterns in teachers' perceptions of the main themes in genetics teaching, teacher  
29 inclinations towards teaching genetics in human context and perceptions of students' interest  
30 in different topics. These patterns, which we call emphasis of content in genetics teaching  
31 could be classified to *Developmental*, *Structural* and *Hereditary*. Teachers with  
32 *Developmental* emphasis embraced teaching genetics in human context while teachers with  
33 *Structural* emphasis avoided them. Contrary to previous research, the less experienced  
34 teachers were most open to discussing human genetics. In general, teachers' justified their  
35 choices by national, local school, and teacher's personal-level factors. While teachers  
36 mentioned that societal and personal contexts are important, at the same time teachers never  
37 framed main themes in genetics with these contexts. We conclude that more emphasis should  
38 be put on how teachers handle issues with societal or personal relevance.

39 **Keywords:** *genetics content, curriculum, biology education, socio-scientific issues*

## HOW DO TEACHERS CHOOSE CONTENT FOR TEACHING?

41

### **Introduction**

42 Curriculum articulates learning goals in school and thus guides teaching. In Finland, the  
43 national curricular goals are managed by legislation, the municipal authorities have an  
44 autonomy to provide and organize education at local level and teachers are valued as experts  
45 who are able to develop and implement the school-specific curriculum (Niemi, Toom, &  
46 Kallioniemi, 2012). Thus, the curriculum leaves a remarkable responsibility and freedom to  
47 the teachers to implement education, for instance, in emphasizing the contents of upper  
48 secondary school courses (Finnish National Board of Education, FNBE, 2003; Niemi et al.,  
49 2012). While the curricular development and its effectiveness are studied extensively (e.g.,  
50 Hargreaves, Lieberman, Fullan, & Hopkins, 2010; Niemi et al., 2012), there is less research  
51 done on how teachers choose contents for their teaching.

52 Teacher beliefs guide to a substantial extent how teachers value different aspects of  
53 knowledge and how much they emphasise different content (Cheung & Wong, 2010;  
54 Cronin-Jones, 1991; Haney, Czerniak, & Lumpe, 1996). Teachers' 'personal knowledge' is  
55 not static, but is formed through everyday experiences and formal schooling, including  
56 teacher education, and continues to be molded in continuing professional education  
57 (Gess-Newsome & Lederman, 1995; Henze, Van Driel, & Verloop, 2007; Van Driel,  
58 Beijaard, & Verloop, 2001), and this personal knowledge shapes teaching to a large extent  
59 (Hashweh, 1987, 2005; van Driel, Bulte, & Verloop, 2008). Nevertheless, personal  
60 knowledge often manifests through rules-of-thumb, rather than formal design (Wieringa,  
61 Janssen, & van Driel, 2011). Consequently, curricular change can cause very little change in  
62 teaching approaches if underlying beliefs about content and the best suited methods to teach  
63 content do not change among the teachers (Cohen & Yarden, 2009; Tidemand & Nielsen,  
64 2017).

## HOW DO TEACHERS CHOOSE CONTENT FOR TEACHING?

65 The main tools for content selection are the available teaching materials, especially textbooks  
66 (Remillard & Bryans, 2004; Shawer, 2017; Spiegel & Wright, 1984). Among teachers, there  
67 is a conflict between following the textbook's content and using them critically, as teachers  
68 seem to understand critical reading of texts as distancing themselves from the text  
69 (Loewenberg Ball, Feiman-Nemser, Ball, & Feiman-Nemser, 1988).

### 70 **Controversial and sensitive issues in teaching**

71 Real world applications of science commonly involve controversial issues, while, in general,  
72 teachers are poorly prepared for teaching controversial issues (Oulton, Dillon, & Grace, 2004;  
73 Oulton, Day, Dillon, & Grace, 2004) and especially less experienced teachers do not seem to  
74 select topics that could be upsetting to students (Hess, 2008; Phillips, 1997).

75 Along the definition of Oulton, Dillon, & Grace (2004), we define controversial issues as  
76 issues on which groups within society hold differing views based on different sets of  
77 information or different interpretations from the available information due to their worldview,  
78 such as different value systems. Sometimes controversial issues may be resolved by additional  
79 information, but not always. For sensitive issues, we follow the ideas of Rowling (1996), who  
80 suggests that the distinction between sensitive and controversial issues seem to be that  
81 sensitive issues are connected to emotionality and the involvement of the individual.  
82 Sensitivity can raise from political, religious, cultural, personal or gender reasons, but in  
83 comparison to controversial issues, which by definition usually work on societal-level,  
84 sensitive issues are more personal.

85 Arguably teacher beliefs are important factors in whether teachers embark on discussions of  
86 controversial issues (Cotton, 2006). Most of the research on teaching controversial issues  
87 have largely been in history and social science classes (i.e., Hess, 2008; Oulton et al., 2004a;  
88 Oulton et al., 2004b) while sensitive issues are discussed in health and physical education

## HOW DO TEACHERS CHOOSE CONTENT FOR TEACHING?

89 (Lynagh, Gilligan, & Handley, 2010; Rowling, 1996). Science subjects are less studied, even  
90 though they do not lack controversial or sensitive topics (Leonard, 2010; Levin & Lindbeck,  
91 1979; Owens, Sadler, & Zeidler, 2017). In discussing controversial issues, teachers have  
92 mentioned problems in beginning and maintaining discussions, dealing with students' "lack  
93 of knowledge", insufficient teaching time, and scarcity of resources (Dawson & Venville,  
94 2008; Dawson & Taylor, 2000; Hand & Levinson, 2012; Kuş, 2015; Reiss, 1999). One of the  
95 solutions should be increasing teachers' confidence to implement teaching societally-relevant  
96 issues, even though they could be controversial (Hofstein, Eilks, & Bybee, 2011).

97 Socio-scientific issues (SSI) have been suggested to empower students to reflect on the effects  
98 and importance of genetics in the world around them (Lederman, Antink, & Bartos, 2014;  
99 Lewis & Leach, 2006; Zeidler, Walker, Ackett, & Simmons, 2002). Nevertheless, teachers  
100 have been resistant to adopt SSI in their teaching (Lazarowitz & Bloch, 2005; Lee,  
101 Abd-El-Khalick, & Choi, 2006). Several reasons have been proposed to explain this  
102 phenomenon, including limitations of the curriculum or assessment techniques, teachers'  
103 pedagogical competence and that teachers lack of support for the merits of SSI discussions as  
104 pertinent to specific learning subjects (Bryce & Gray, 2004; Gray & Bryce, 2006; Lewis &  
105 Leach, 2006; Newton, Driver, & Osborne, 1999).

106 Content selection also seems to relate to the identity of the teacher. Albe and Simonneaux  
107 (2002) used a theory of planned behavior (Ajzen, 1991) to approach this problem and they  
108 revealed stark differences among teachers in different subjects and how teachers' attitudes  
109 towards societal issues are shaped. The question of identity of the teachers, as experts in  
110 biology versus experts in discussing human genetics seems to be one of the central problems  
111 (Pedretti, Bencze, Hewitt, Romkey, & Jivraj, 2008; Tidemand & Nielsen, 2017). This seems  
112 to also be reflected in the students: for example, in a Swedish study, upper-secondary school

## HOW DO TEACHERS CHOOSE CONTENT FOR TEACHING?

113 students majoring in science used few justifications from ethics or morality when discussing  
114 GMOs (Christenson, Chang Rundgren, & Zeidler, 2014).

### 115 *Genetics contents and curricular development*

116 Genetics in secondary school biology curriculum has been emphasised in recent years, as the  
117 progress in both basic science of genetics and the technological applications has been rapid.  
118 This is likely to lead to both curricular renewal and the constant requirement of teacher  
119 development. Choosing content for genetics courses poses a practical challenge for teachers  
120 and fundamentally shows, what genetics could be seen as constitute of from a teaching  
121 perspective.

122 There have been a number of endeavors to outline what would be the core (conceptual)  
123 contents of genetics in different levels of lower and upper secondary school curricula.  
124 Stewart, Cartier, & Passmore (2005) outlined that basic understanding of genetics requires  
125 understanding three basic models: genetic (i.e., Mendelian inheritance patterns), meiotic (i.e.,  
126 chromosome segregation and assortment) and biomolecular (i.e., genotype-to-phenotype  
127 process). This was in turn refined by Duncan et al. (2009) who added environment as a  
128 context and outlined their learning progression around two big ideas: 1) “All organisms have  
129 genetic information that is universal and specifies the molecules that carry out the functions of  
130 life. While all cells have the same information, cells can regulate which information is used  
131 (expressed).” and 2) “There are patterns of gene transfer across generations. Cellular and  
132 molecular mechanisms drive these patterns and result in genetic variation. The environment  
133 interacts with our genetic makeup leading to variation.” In their Delphi study of genetic  
134 literacy, Boerwinkel et al. (2017) furthermore added a difference between somatic and germ  
135 line and polygenic inheritance to previous core contents and emphasized also sociocultural  
136 and epistemic knowledge. In general, the diversification of core contents in genetics education

## HOW DO TEACHERS CHOOSE CONTENT FOR TEACHING?

137 from Mendelian genetics to polygenic traits seems to mirror the change in gene research  
138 emphasis from quantitative genetics to genomics and whole-genome sequencing.

### 139 *Genetics in the Finnish upper-secondary school biology curriculum*

140 In Finland, approximately half of each age class enter general upper secondary schools, which  
141 aims to both provide general knowledge required for an active participation in society and  
142 prepare students for further education in tertiary level and working life. Finnish biology  
143 teachers at upper secondary level have at least Masters level degree, including one-year of  
144 studies in teacher education and one year of study in biology (see Niemi et al., 2012).

145 Finnish curricula tend to leave substantial freedom for teachers to interpret the educational  
146 aims and develop multiple different methods to implement curricula. Finnish teachers plan  
147 teaching according to local curricula, which are formulated by the education providers and  
148 schools based on the national core curriculum for general upper-secondary schools (FNBE,  
149 2003) The core content pertaining to genetics is mostly limited to two courses: Cells and  
150 heredity (BI2), which is mandatory for all students, and Biotechnology (BI5), which is an  
151 optional course in the biology curriculum (Table 1).

152 [Table 1 here]

153 While teachers' practices and attitudes towards different teaching approaches and methods  
154 have been widely studied in science education (e.g., Lederman & Abell, 2014), there is far  
155 less research on what contents and examples teachers choose for their teaching and how they  
156 justify their choices for instance in an upper-secondary school biology course. As the Finnish  
157 school framework provides for ample freedom for teachers to adopt the most suitable teaching  
158 methods and biology teachers are generally educated broadly in different fields of biology,  
159 this allowed us to explore the curricular genetics contents the teachers emphasize in their  
160 teaching and what are teachers' perceptions of controversial and sensitive issues in genetics.

## HOW DO TEACHERS CHOOSE CONTENT FOR TEACHING?

161 We used interviews to examine teachers' answers to questions about how they use three  
162 different human-related contexts in their teaching: genetically modified organisms, human  
163 hereditary disorders and complex human traits, such as intelligence. The first context, GMOs,  
164 is explicitly mentioned in the national core curriculum, and teachers must discuss the ethics of  
165 GMOs. The second context, hereditary disorders, is not mentioned in the curriculum, but most  
166 known examples of Mendelian genetic traits in human context are hereditary disorders.  
167 Thirdly, complex human traits, like intelligence, are not mentioned in the curriculum, but this  
168 context can be used to discuss polygenic inheritance. Thus, these contexts differ in how easy  
169 it is to avoid using them: while avoiding GMOs is not possible for teachers, complex human  
170 traits can be easily avoided.

171 Our research questions were:

- 172 1. What do teachers perceive as the main contents of genetics teaching in the upper  
173 secondary school in biology?
- 174 2. How teachers argue for their use of human-related contexts in genetics teaching?
- 175 3. What kind of controversial or sensitive issues do the teachers consider when teaching  
176 of genetics?

## 177 **Methods**

178 Our research design was a qualitative case study. We conducted open-ended semi-structured  
179 interviews with 10 upper secondary high school biology teachers from various schools from  
180 Southern and Western Finland between 2015 and 2016 (see Table 2). Teachers were selected  
181 purposively to reflect a variation in experience, gender, type of school and geographical  
182 location in order to access different teachers with knowledge about upper secondary school  
183 biology education. All teachers had biology as a major subject in their university master's



## HOW DO TEACHERS CHOOSE CONTENT FOR TEACHING?

184 degree. Additionally, we collected diary data and other teaching materials from teachers how  
185 they actually teach genetics.

### 186 *Interviews*

187 The interviews lasted from 40 minutes to 1 hour and 32 minutes. Teachers were asked: a)  
188 what they perceive as the most important contents and contexts in genetics, b) how they  
189 acquire knowledge for teaching and c) what examples they use during the two courses, BI2,  
190 for Cells and heredity course for all students, and BI5, a Biotechnology optional course (Table  
191 1). Especially, we asked how teachers teach the topic of GMOs in the BI5 course and what  
192 kind of examples of human genetics they use in courses BI2 and BI5.

193 Our aim was to find out how teachers justify their content and context choices in genetics  
194 teaching. We used a theory-guided content analysis to categorize the data in a six-stage  
195 process by following the ideas of abductive analysis laid out by Timmermans and Tavory  
196 (2012): 1) we transcribed the interviews; 2) we coded the transcripts one sample at a time by:  
197 a) which subject matter teachers thought was the most crucial and which could be left aside,  
198 b) how they argued for including or excluding certain course content and c) how they  
199 described what they feel students feel important; 3) beginning from the first sample, we  
200 named concepts arising from the grouped codes and after each sample, recursively performed  
201 stages 2 and 3 for previously-coded samples (which would correspond to initial analysis as  
202 per Charmaz (2003); 4) after initial samples were coded and concepts named, we integrated  
203 categories (focused analysis); 5) we contrasted the teachers to each other to understand the  
204 connections between categories, and 6) we refined the model. We used the R (R Core Team,  
205 2013) package RQDA (Huang, 2017) for the analysis.

206 We contrasted the emerging codes with the assumption that teachers' content and context  
207 choices are guided by national and local curriculum, teaching materials and teachers' personal

## HOW DO TEACHERS CHOOSE CONTENT FOR TEACHING?

208 knowledge. When coding content choices, three different groups emerged: monohybrid  
209 crosses in humans, polygenic properties of humans and GMOs. Within these three groups, we  
210 coded on later recursions all the mentions of the issues the teachers described that a) they use  
211 in teaching, b) they avoid using in teaching, c) the topics in which the students express  
212 interest, and d) topics in which the students express no interest in. We then simplified  
213 authentic expressions in the open codes to a combinations which would describe general-level  
214 biological phenomena, such as evolution, inheritance or gene expression. After half of the  
215 samples were coded, selective coding was used to delimit the coding process. Purposive  
216 sampling fitted well this research approach as our data was rather rapidly saturated: by the  
217 ninth sample, there was no new information useful for the category formation. After the  
218 analysis process, we asked teachers whether they agree on our analysis of the emphasis of  
219 their teaching.

### 220 *Trustworthiness*

221 To assess the connection between descriptions that the teachers gave of their teaching during  
222 the interviews and their actual teaching, we asked the teachers to keep diary of their teaching  
223 after the interviews. We suggested that teachers write down for each lesson the topics,  
224 teaching methods, which textbook chapters and exercises were discussed and on which topics  
225 the students asked questions or clarifications. Additionally, teachers who had ready-made  
226 lecture slides sent those to us. An outside observer and first author classified diaries and other  
227 materials based on previously formed classifications (Table 2), which allowed us to compare  
228 teachers' interviews and actual teaching.

229 We continuously evaluated the trustworthiness for our study in several ways (Morrow, 2005).  
230 During the category formation, we looked for disconfirming data and assessed data saturation.  
231 The credibility was also enhanced by continuous discussion and revising the meanings and  
232 coding of the data during the categorization by the first author and the transcriber, who was a

## HOW DO TEACHERS CHOOSE CONTENT FOR TEACHING?

233 sociolinguist. Transferability was improved by a rich description of the research process in the  
234 form of an audit trail. Audit trail was drafted based on the memos and the developed coding  
235 schemes. The authors evaluated the audit trail and agreed with research process.

236 [Table 2 here]

237

238

### **Findings**

239 *What do teachers perceive as the most important content in genetics courses?*

240 When we asked teachers to summarise what they hoped students would learn from upper-  
241 secondary school biology courses, the teachers mentioned different contents (Table 2, Table  
242 S1). We divided their answers to three distinct themes: 1) development of phenotype, 2)  
243 inheritance and continuity and 3) the structure and function of the genes. Some teachers gave  
244 several descriptions that fitted two of these themes, but none described all three.

245 The first theme, development of phenotype, contains descriptions that focused on  
246 understanding how genes and environment shape the development of different traits (i.e.,  
247 genetic determinism). These descriptions were often related directly to how students  
248 themselves have developed and to understanding of how human individuals have formed:

249       Teacher J: “Humans are constructed by many factors, of which genome influences  
250       greatly, or they are things which we cannot influence ourselves; they come directly  
251       from the genome, but also genes do not dictate how we live our lives, what kind of  
252       persons we are, and how we behave.”

253 The second theme, inheritance and continuity, is centered on the concept that there is genetic  
254 continuity in the tree of life and that DNA copies itself from generation to generation.

255 Teachers who described concepts relating to this theme saw the understanding of evolution as

## HOW DO TEACHERS CHOOSE CONTENT FOR TEACHING?

256 the focal point of whole field of biology and saw genetics as central to this understanding.

257 Biodiversity was mentioned as one manifestation of this continuity. Sometimes the

258 descriptions of the most important ideas were affective:

259       Teacher C: “The common thread of life, from the beginning, the same genes are  
260       flowing; we are composed of genes from a million persons from thousands of years  
261       and then a new combination pops up, from the stream of life.”

262 The third theme, the function of the genes, was the simplest theme in terms of how teachers  
263 described it. They usually said that it was important to understand what genes are and how  
264 they function, while offering no reference to any reason why it is so. Some teachers  
265 mentioned that it is important in terms of general knowledge to know these topics.

266       Teacher B: “If I say it concisely, what is the gene and how does it function is the core  
267       knowledge a student should have.”

### 268 *Use of human-related contexts in genetics teaching*

#### 269 *GMOs*

270 Most of the teachers approached ethical questions as being superimposed on the biological  
271 content within a course and they thought the students should know the biological contents of  
272 GMOs before discussing their ethical dimensions (Table S2). Some teachers also suggested  
273 that students have highly polarised opinions on GMOs before coming to a course and that  
274 “knowledge” could help in seeing the different aspects of the debate.

275       Teacher F: “We have two types of students, so that they are pretty black-and-white.  
276       Some of them have already been kind of brainwashed to think that “this is all great”,  
277       while a minority, or I don’t know if they don’t just dare to tell me, are against GMOs.”

## HOW DO TEACHERS CHOOSE CONTENT FOR TEACHING?

278 Three teachers said that they use SSI as a means to motivate students in the beginning of the  
279 course, while the other seven said that they first teach the biological content and then move to  
280 ethical discussions. Still, ethical questions were seen as secondary to biological content:

281 Teacher J: "...there's not always much time for discussions – the time spent in ethical  
282 discussions is always reduced from less than what is spent on the course texts."

### 283 *Human genetics*

284 Teachers mentioned that the use of human examples in genetics is mostly limited to  
285 Mendelian disorders in BI2 course (Table 2, Table S3) and more complex traits are then  
286 discussed at the end of BI2 or during the BI5 courses (Table 2, Table S4). Teachers  
287 commonly held the opinion that students are interested in hereditary phenomena in general  
288 (Table S5), but there is mismatch in how textbooks frames genetics and what the students'  
289 interests are: while students are mainly interested in human genetics, the textbooks lack good  
290 examples and teachers did not feel themselves competent to go deeper into the topic:

291 Teacher J: "... [student asks] if I have blue eyes and my boyfriend has brown eyes,  
292 then what color will our children's eyes be, but unfortunately I have to try to contain  
293 their excitement as I don't know the answers to their questions."

294 Some teachers mentioned that they use classic, if not the most correct, examples like a  
295 widow's peak or rolling the tongue. All teachers who used these examples said that,  
296 nevertheless, they mention to students that in reality, genetics is not that simple.

297 Two teachers mentioned that they try to avoid human context in general and three other  
298 teachers said that they try to avoid discussing complex human traits, such as talent,  
299 intelligence, or human behavior (Table 2, Table S6):

## HOW DO TEACHERS CHOOSE CONTENT FOR TEACHING?

300 Interviewer: Do you discuss how genetics affects learning? What if some students  
301 have genes that allow them to achieve better grades?

302 Teacher E: No, no. (pause). No.

303 Interviewer: No?

304 Teacher E: No, we don't discuss that.

305 Interviewer: No one is interested?

306 Teacher E: No. I'm not interested either (laughs)

307 *Interviewer laughs*

308 Teacher E: I think it is very sensitive issue. I would reconsider several times before  
309 talking about it.

310 Most teachers said that they discuss human behavioral genetics if students ask questions, but  
311 they do not bring the topic up themselves. In contrast, some teachers said the discussions are  
312 needed, especially in the context of racial issues:

313 Teacher D: "It is relevant for the students if it is discussed in public, societal debate –  
314 [they may want to know if] citizens from certain continents are less intelligent than  
315 others–, and we have discussed these alternative news a lot, how they publish utter  
316 nonsense."

### 317 *Controversial or sensitive issues in genetics*

318 Half of the teachers did not identify any sensitive or controversial issues, which they would  
319 avoid (Table 2, Table S6). Among the other half there were differences in how they framed  
320 sensitive and controversial issues. Most of the argumentation was related to what is seen as  
321 biological general knowledge or avoiding misconceptions on genetics: teachers mentioned or

## HOW DO TEACHERS CHOOSE CONTENT FOR TEACHING?

322 implied that complex human traits are inherently so complex that there is a significant risk  
323 that students would form misconceptions on overtly genetic determinations of these traits.  
324 Furthermore, the lack of examples and lack of teacher competence was seen as leading to  
325 teaching without meaningful contents. The two teachers who avoid humans as a context  
326 argued that humans are just one species, and it is not meaningful to concentrate too much on  
327 humans in biology.

328 Additionally, teachers mentioned how some issues are uncomfortable to them or to their  
329 students. Regarding students, some teachers acknowledged that discussing human heredity  
330 can pose several challenges (Table 2, Table S6). For example, using blood group testing can  
331 raise questions and even distress students if their blood group is not concordant with their  
332 parents' blood groups. One teacher mentioned she does not want to do pedigrees on simple  
333 traits with students because of the “diversity of families” and her not knowing the  
334 backgrounds of the students. The reason for describing these issues as “uncomfortable” was  
335 framed as a question of teacher not knowing how to deal with discussing these issues or  
336 encountering unexpected reactions from the students. Those teachers willing to discuss  
337 genetic disorders of students or their families argued that generally those affected know best  
338 about the issues. One teacher also mentioned that sensitive issues bring up emotions, but that  
339 it is also natural in a classroom setting:

340           Teacher C: “Sometimes I’ve gone and hugged a student – I find it a good way to calm  
341           down. – Every now and then I have tears in my eyes, but I think it’s important to show  
342           my own persona in my teaching.”

### 343 *Teachers frame genetics teaching with different emphases*

344 Teachers' perceptions of the most important genetic content were closely related to their  
345 willingness to use human context in their teaching or even what they said that students find

## HOW DO TEACHERS CHOOSE CONTENT FOR TEACHING?

346 interesting (Table 2). For example, none of the teachers whose theme in genetics teaching was  
347 classified as “development of phenotype” mentioned that they try to avoid human complex  
348 traits. In turn, both teachers who said that students are interested in gene testing had their  
349 theme grouped to “inheritance” and both teachers who mentioned students are interested in  
350 epigenetics to “development of phenotype.”

351 Three different general frameworks of teaching genes and their role arose from the analysis:  
352 *Developmental*, *Structural* and *Hereditary* (Table 3). We call these emphasis of contents in  
353 genetics teaching, as they relate to how teachers argue for their choice of contents and which  
354 they see as the most important contents or themes, but also which contexts they use, how they  
355 perceive student interest and whether they avoid certain topics. Furthermore, they align with  
356 perception of sensitive or controversial issues. We note that these emphases do not consider  
357 how teachers understand genes or their function, but rather what teachers see genetics to  
358 constitute of from a teaching perspective.

359 A *Developmental* emphasis frames the development of traits as the central theme in genetics  
360 and consequently teachers who used this approach were largely open to any discussions, they  
361 did not mention any topic they would avoid, and most of them mentioned that they have  
362 regular discussions about complex human traits as they felt that students are most interested in  
363 these. Furthermore, teachers with *Developmental* emphasis were less likely to describe any  
364 perceived sensitive issues than other teachers (Table 2). These teachers were all  
365 comparatively the less experienced teachers of the interviewed group (12 or fewer years of  
366 experience). Their emphasis contrasts with two teachers who used a *Structural* emphasis  
367 mentioning only gene function as the central issue. These teachers mentioned avoiding  
368 discussing complex traits in humans or humans at all, as they find these both sensitive and not  
369 good examples of polygenic inheritance. In contrast, these teachers described hereditary  
370 analysis as an interesting part of the genetics course. They were among the most experienced



## HOW DO TEACHERS CHOOSE CONTENT FOR TEACHING?

371 teachers (> 20 years). A third emphasis, *Hereditary*, was characterised by emphasis on the  
372 continuity of DNA through the whole tree of life. This emphasis manifested in teachers'  
373 answers as being somewhere between the two previous emphasis. Teachers which used this  
374 emphasis were willing to discuss complex human traits if the students asked about them, but  
375 did not actively raise examples. They generally used an example of human skin color as an  
376 example of polygenic traits. More broadly, in genetics, they usually emphasised the  
377 understanding of phenomena related to DNA duplications, such as meiosis. A hereditary  
378 emphasis was used by both less and more experienced teachers.

379 [Table 3 here]

380 In contrast to the issues involving the human complex traits, genetics content emphasis were  
381 not connected how teachers taught GMOs (Table S2). While some teachers were more  
382 dismissive about teaching on SSI while discussing GMOs, and said that there was not always  
383 time to go through those topics, they were not differentiated based on their genetics emphasis.  
384 Furthermore, one teacher who said that they use GMOs as a motivation in the beginning of  
385 the course, to explain how genetics are important, said that they do not always have time to go  
386 into ethics of GMOs. In general, lack of time is a general perception of teachers in different  
387 subjects and countries (Adams & Krockover, 1997; Archbald & Porter, 1994; Fuller, 1969)  
388 and the interviewed teachers also expressed this idea repeatedly. This reason worked in  
389 concert with the acknowledgement from most teachers that their teaching closely follows to  
390 the textbook, and textbooks tend to discuss ethical dimensions of biotechnology at the end of  
391 the book (Aivelo & Uitto, 2015).

### 392 *Teacher self-identification and relationship to actual teaching*

393 When we provided teachers with the descriptions of the genetics emphasis and our analysis of  
394 their interview, six teachers agreed with our analysis, three teachers disagreed and we could

## HOW DO TEACHERS CHOOSE CONTENT FOR TEACHING?

395 not contact one teacher (Table 2). All disagreeing teachers had their teaching emphasis  
396 labelled to Developmental. Two of the teachers also argued for that their emphasis was not  
397 the one they would have preferred for genetics teaching, but it was mostly dictated by national  
398 curriculum, which mentions evolution and development in different courses.

399 We obtained teaching diaries and other teaching materials with enough information for our  
400 analysis from five teachers. In categorization, the interrater reliability was high (Cohen's  
401 kappa: 0.88). The concurrence between interviews and diaries was variable as some teachers  
402 were fully concordant (such as teachers B and H), whereas Teachers G and J had two  
403 discordant categorizations (Table S7). In total, 18 of 22 analysing units were concordant  
404 between the interviews and diaries.

### 405 *Factors behind teachers' choice of content*

406 Although there were large differences in teachers' emphasis in genetics teaching, there were  
407 some similarities in their arguments on factors influencing their content choices (Table 2).  
408 While the teachers described their teaching in very different terms, all expect teacher E said  
409 that 1) they follow closely the textbook content. Because the contents of biology textbooks for  
410 upper-secondary school is highly similar (Aivelo & Uitto, 2015), teachers clearly had  
411 different personal priorities on the most important contents and contexts. All schools follow  
412 2) the national core curriculum (FNBE, 2004), and this was evident in teachers' descriptions  
413 of their content choices (Table 2, 3). Furthermore, this was emphasised by the inclusion of  
414 GMOs in the biology core curriculum by all teachers (Table 3). The national core curriculum  
415 is also the basis for the tasks on the matriculation examination that the students take in the end  
416 of the upper secondary school in Finland (Niemi et al., 2012) and teachers acknowledged that  
417 3) previous exam questions guide their teaching.

## HOW DO TEACHERS CHOOSE CONTENT FOR TEACHING?

418 The aforementioned factors were quite similar for each teacher, but our results also reveal  
419 perceived differences among teachers and the 4) school-specific circumstances in which they  
420 are working. Some of the teachers compared their school to other schools, and suggested that  
421 some attributes of their school attract students with specific interests or motivation or  
422 competence to study biology. Likewise, teachers described differences in course  
423 arrangements, and noted if it was possible to conduct experiments in the classroom.  
424 Furthermore, teachers expressed that there are 5) personal reasons that affect their course  
425 content selection. On many occasions the teachers acknowledged the limits of their  
426 competence, either regarding genetics contents, such as when they are unable to answer  
427 complicated questions of the students, or pedagogically, when they mentioned they might  
428 have problems in successful guiding of classroom discussions.

## 429 **Discussion**

### 430 *Teachers' emphasis in genetics*

431 Our findings suggest that there were fundamental differences in Finnish upper secondary  
432 school biology teachers' perceptions on the most important themes in genetics and genetics  
433 teaching and subsequently how they chose course content and context while teaching  
434 genetics. The perceptions can be classified to three distinct content emphasis, which we  
435 named *Structural*, *Hereditary* and *Developmental*. These emphases are formulated on the  
436 basis of what teachers interpret as 1) the central themes in genetics, 2) how they use human  
437 contexts in their genetics teaching, 3) how they understand students' interest towards different  
438 contents and contexts and 4) whether they perceive genetics include sensitive or controversial  
439 issues.

440 Our findings are partly similar to those of Van Driel et al. (2007), who found separate  
441 subgroups of teachers who teach either subject-matter oriented focusing on fundamental,

#### HOW DO TEACHERS CHOOSE CONTENT FOR TEACHING?

442 theoretical concepts or learner-centered emphasising societal issues. While *Structural*  
443 emphasis can be seen as subject-matter oriented, *Developmental* emphasis is not learner-  
444 centered in similar sense as in Van Driel et al.'s study, as the orientation is not as much  
445 societal as it is personal. Stewart, Cartier and Passmore (2005) outlined three different models  
446 of genetics understanding: inheritance pattern model, meiotic model and biomolecular model.  
447 These models are quite close to our concept of content emphasis: inheritance patterns model  
448 and *Hereditary* emphasis are similar and *Structural* resembles meiotic model while  
449 *Developmental* has less common with biomolecular model.

450 The diversity of emphases can be explained, for example, with complex educational context  
451 in Finnish upper secondary school. Finnish upper secondary school aims to train students for  
452 tertiary education, but also to develop scientific literacy to those students who do not study  
453 biology further. The biology course “Cells and heredity” is compulsory to all students of  
454 which approximately one third complete biology part of matriculation examination  
455 (Matriculation Examination Board, 2019). Thus, the teachers are balancing with what Roberts  
456 (2007) referred to as vision I (as knowledge within science) and vision II (as knowledge in  
457 everyday situations) of the scientific literacy.

458 Moreover, genetics content emphasis can be seen as partly overlapping with “science teaching  
459 orientations” (Magnusson, Krajcik, & Borko, 1999) as they contain knowledge of the  
460 importance of different concepts, interpretation of curricula, the motivations of the students,  
461 and representations and context of core concepts. In comparison, while the science teaching  
462 orientations describe teachers’ perceptions about teaching and especially instruction methods,  
463 we did not find that genetics content emphasis would limit the instruction methods.  
464 Nonetheless, the different emphases raises the question of how differential teacher  
465 understanding of core concepts and contexts influences teaching methods or orientations to

## HOW DO TEACHERS CHOOSE CONTENT FOR TEACHING?

466 teaching science. In a follow-up study, we aim to study teachers' gene concepts and whether  
467 they relate to different emphasis.

### 468 *Human-related contexts involve controversial and sensitive issues*

469 Our research setting in comparing three different human-related contexts - GMOs, Mendelian  
470 human traits and complex human traits - contrasts the effects of curriculum-dictated context  
471 choice and free choice by teachers, and highlights the difference between personal and  
472 societal relevance. Our interviews showed a paradoxical approach by teachers: while they said  
473 that genetics is a societally relevant topic, and that students should learn analytical tools to  
474 take part in decision-making and be responsible consumers, this was not evident in their  
475 descriptions of their teaching. Without exception, teachers formulated the basic science as the  
476 main issue and, in many cases, societal aspects of GMOs were described to be taught only "if  
477 there was time at the end of the course." Our results agree with Tidemand and Nielsen's  
478 (2017) suggestion that emphasis on biological content (as opposed to more societal context) is  
479 driven by teachers' identity as biology teachers. Nevertheless, all teachers did teach GMOs as  
480 they are explicitly mentioned in national curriculum.

481 In comparison, some teachers described avoiding human genetics contexts which could be  
482 seen as personally highly relevant to students. These teachers were also more likely to  
483 describe controversial or sensitive issues related to genetics teaching. It is noteworthy, that  
484 teachers framed sensitive issues in human genetics in relation to students personally, as  
485 something which concerns individual students and not as much society at large. Thus, in  
486 Rowling's (1996) categorization, the teachers were more worried about sensitive issues than  
487 controversial issues. Furthermore, this suggests that there is a trade-off between personal  
488 relevance to students and perceived problems arising from sensitive issues. As this was not  
489 mentioned in relation to GMO teaching, teachers seem to be more hesitant towards this  
490 personal relevance, rather than societally controversial issues.

## HOW DO TEACHERS CHOOSE CONTENT FOR TEACHING?

491 The avoidance of human contexts is a complex issue as teachers used numerous reason for  
492 steering clear, for example, human genetics: a) students are not interested in these topics, b)  
493 teachers do not have enough content knowledge, c) teachers do not have pedagogical  
494 knowledge for teaching sensitive issues and d) discussing genetics in human context would  
495 lead to negative learning outcomes, such as misconceptions. In general, controversial issues  
496 were thought to lead to misconceptions, whereas sensitive issues were seen to lead to  
497 awkward situations for individual students. We are not able to assess how relevant these  
498 different factors are, but it is clear from our content emphasis classification that there are  
499 fundamental differences in how teachers perceive the most important contents and contexts in  
500 genetics. Furthermore, contrary to the previous studies (Hess, 2008; Phillips, 1997), our study  
501 suggests that Finnish teachers are open to discuss complex human traits and other sensitive  
502 issues in classroom even when they are not experienced.

### 503 *Limitations of the study*

504 While the number of interviews in our study is limited, we reached data saturation rapidly.  
505 One reason for this may be the similarities in the educational background of the teachers, as  
506 all of them had master's degree with biology as the major subject, and pedagogical studies in  
507 teacher education as a minor subject. Moreover, the textbooks used by the teachers are quite  
508 similar, emphasizing gene structure and function (Aivelo & Uitto, 2015). Due to small  
509 number of participants and limited knowledge on teachers' background, we cannot discuss  
510 other factors than those mentioned by the teachers: namely, the role of used textbooks,  
511 biology curriculum, practicing for the matriculation examination and school-specific and  
512 personal factors. The interpretive disagreements on genetics content emphasis between some  
513 teachers and researchers were all related to *Developmental* emphasis. Nevertheless, the  
514 interrater reliability in categorization and the concordance between teacher interviews and  
515 diaries was rather high.

## HOW DO TEACHERS CHOOSE CONTENT FOR TEACHING?

516 Potential sources of bias were minimized by allowing the interviews to be as freely advancing  
517 as possible and questions were designed to prevent confirmation bias by probing for  
518 disconfirming answers and leading questioning by starting each strain of questions by as  
519 general questions as possible. Research positionality was reflected regularly through  
520 interactions between the authors and in discussions with outside researchers and biology  
521 teachers. The authors have multi-faceted relationship towards participant community as they  
522 are involved in teacher education and in-service teachers' continuing education and both have  
523 background as upper secondary school biology teachers. Both authors have also been  
524 involved in national core curriculum process. Thus, the authors are insiders in the participant  
525 community but also hold positions of power. This setting was approached by emphasizing to  
526 teachers that they are experts in teaching practice and that the researchers were genuinely  
527 interested on their answers.

### 528 *Implications for research and teaching practice*

529 National curriculum for upper secondary schools gives a substantial freedom to teachers to  
530 interpret the contents and goals of biology education in classroom practice (FNBE, 2004;  
531 Niemi et al., 2012). This may partly explain the fundamental differences in content emphasis  
532 that we found. Consequently, in school practice, teacher education, and in-service training, the  
533 teachers should be made more aware and provide opportunities for self-reflection on the  
534 emphasis they take in teaching science.

535 We also suggest that our findings on which contents teachers choose for their teaching  
536 provides a well-grounded hypothesis for further research on the content perspective of  
537 experienced, autonomous biology teachers. The relationship between content emphasis and  
538 the choice of course content could provide a more widely applicable hypothesis for studying  
539 teaching and learning genetics in biology education, because teachers have freedom to choose  
540 whether or not to apply sensitive human context to their teaching.

## HOW DO TEACHERS CHOOSE CONTENT FOR TEACHING?

541 In light of GMO SSIs being integrated in the teaching, independent of teacher inclinations, we  
542 suggest that the curriculum development would be valuable approach if genetics education  
543 aims to better incorporate societal and personal relevance. Furthermore, curriculum  
544 development needs to be connected with teacher education emphasizing pedagogical content  
545 knowledge (Käpylä, Heikkinen, & Asunta, 2009). While teachers appreciate a “knowledge  
546 first” approach to SSI and avoidance of human related topics, there is a perceived lack of  
547 useful and tested teaching materials. Content knowledge is important for successful reasoning  
548 regarding SSI: thus, a delicate balance needs to be sought (Lederman et al., 2014; Sadler &  
549 Zeidler, 2004)

550 From our interviews, it is clear that the personal relevance in teaching can be a double-edged  
551 sword in the classroom: while some teachers see it as a possibility, some seem to avoid it due  
552 to a number of reasons. This needs to be addressed more in professional development. In  
553 general, the ways of teaching controversial and sensitive issues are not well-studied and the  
554 recommendations themselves are controversial (Christopher Oulton et al., 2004). Thus, both  
555 societal and personal relevance should be taken more into account in science and especially in  
556 biology teacher education and in-service training.

## 557 **Conclusions**

558 Based on qualitative case study and teacher interviews, we have found that teachers’  
559 perceptions of genetics teaching reflected three different emphases, which we named as  
560 *Structural*, *Hereditary*, or *Developmental* content emphasis. These emphases consists of  
561 teachers’ perceptions of the most important themes in genetic content, willingness to teach  
562 about human traits, perceived sensitive or controversial issues in genetics and students’  
563 perceived interests. Interestingly, teachers having *Structural* emphasis described avoidance of  
564 human genetics context in their teaching, while teachers with *Developmental* emphasis  
565 described very abundant use of human genetics contexts. Thus, teachers’ perceptions of which



## HOW DO TEACHERS CHOOSE CONTENT FOR TEACHING?

566 themes in genetics are the most important could also shape how likely they are to use  
567 personally relevant contexts in their teaching. As we did not observe the actual teaching  
568 practice, we do not know how well these emphases manifest in teaching itself and whether  
569 these have an actual effect on student learning outcomes. Our ongoing research project could  
570 shed light in this by comparing student interests and attitudes to their teacher's genetics  
571 content emphasis. Nevertheless, we suggest that teachers' perceptions on the most important  
572 themes in their teaching can have wide-ranging consequences, for example, inclusion of  
573 socioscientific issues in the teaching.

574 Our results also revealed different approaches to the sensitive and controversial issues in  
575 genetics teaching. Not all teachers perceived that sensitive or controversial issues would affect  
576 their teaching and those who did, usually describe sensitive rather than controversial issues,  
577 thus suggesting that teachers are more worried about personal issues in genetics. Indeed,  
578 sensitivity was sometimes used as a justification to not include contents or contexts which are  
579 personally relevant to genetics teaching. We note that teachers would need more support to  
580 handle controversial and sensitive issues in the classroom. In contrast to personally relevant  
581 human genetics, Finnish curriculum specifically mentions GMOs and compels teachers to  
582 discuss them. Subsequently, every teacher mentioned that they discuss GMOs. Thus, we also  
583 argue that curricular development is an effective way to increase the prominence of societal or  
584 personal relevance in biology education.

585

HOW DO TEACHERS CHOOSE CONTENT FOR TEACHING?

586

**Acknowledgments**

587 The authors wish to thank the ten biology teachers who participated in this study, Marlene  
588 Broemer for checking the language in manuscript, Lotta Aarikka for transcribing the  
589 interviews and providing debriefing during initial analysis, Justus Mutanen for teaching diary  
590 analysis and fruitful discussions and Niklas Gericke for comments on earlier version of  
591 manuscript.

592

**Appendix**

593 Supplemental material in Figshare (doi: 10.6084/m9.figshare.8427056) includes following  
594 tables containing representative quotes from teacher interviews:  
595 Table S1: Teacher's descriptions of the central theme of their teaching.  
596 Table S2: Teacher's descriptions of GMOs in their teaching.  
597 Table S2: Teacher's descriptions of the human Mendelian disorders in their teaching.  
598 Table S3: Teacher's descriptions of the complex human traits in their teaching.  
599 Table S5: Teacher's descriptions of the perceived student interest in genetics.  
600 Table S6: Teacher's descriptions of perceived sensitive issues.  
601 Table S7: The concurrence between teaching diary and other materials in comparison to  
602 teacher interviews.

603

## HOW DO TEACHERS CHOOSE CONTENT FOR TEACHING?

604

### References

- 605 Adams, P. E., & Krockover, G. H. (1997). Concerns and perceptions of beginning secondary science and  
606 mathematics teachers. *Science Education*, 81(1), 29–50. [https://doi.org/10.1002/\(SICI\)1098-  
607 237X\(199701\)81:1<29::AID-SCE2>3.0.CO;2-3](https://doi.org/10.1002/(SICI)1098-237X(199701)81:1<29::AID-SCE2>3.0.CO;2-3)
- 608 Aivelo, T., & Uitto, A. (2015). Genetic determinism in the Finnish upper secondary school biology textbooks.  
609 *NorDiNa - Nordic Studies in Science Education*, 11(2), 139–152.
- 610 Ajzen, I. (1991). The theory of planned behavior. *Organizational Behavior and Human Decision Processes*, 50,  
611 179–211. [https://doi.org/10.1016/0749-5978\(91\)90020-T](https://doi.org/10.1016/0749-5978(91)90020-T)
- 612 Albe, V., & Simonneaux, L. (2002). L'enseignement des questions scientifiques socialement vives dans  
613 l'enseignement agricole: Quelles sont les intentions des enseignants? *Aster*, (34), 131–156.  
614 <https://doi.org/10.4267/2042/8791>
- 615 Archbald, D. A., & Porter, A. C. (1994). Curriculum control and teachers' perceptions of autonomy and  
616 satisfaction. *Educational Evaluation and Policy Analysis*, 16(1), 21–39.  
617 <https://doi.org/10.3102/01623737016001021>
- 618 Board, M. E. (2019). Ilmoittautumiset eri kokeisiin. Retrieved July 2, 2019, from  
619 <https://www.ylioppilastutkinto.fi/ext/stat/FS2019A2010T2010.pdf>
- 620 Bryce, T., & Gray, D. (2004). Tough acts to follow: The challenges to science teachers presented by  
621 biotechnological progress. *International Journal of Science Education*, 26(6), 717–733.  
622 <https://doi.org/10.1080/0950069032000138833>
- 623 Charmaz, K. (2003). Grounded theory. In J. A. Smith (Ed.), *Qualitative Psychology: A Practical Guide to*  
624 *Research Methods*. Thousand Oaks, CA, USA.
- 625 Cheung, D., & Wong, H.-W. (2010). Measuring teacher beliefs about alternative curriculum designs. *Curriculum*  
626 *Journal*, 13(2), 225–248. <https://doi.org/10.1080/0958517021013686>
- 627 Christenson, N., Chang Rundgren, S. N., & Zeidler, D. L. (2014). The relationship of discipline background to  
628 upper secondary students' argumentation on socioscientific issues. *Research in Science Education*, 44(4),  
629 581–601. <https://doi.org/10.1007/s11165-013-9394-6>
- 630 Cohen, R., & Yarden, A. (2009). Experienced junior-high-school teachers' PCK in light of a curriculum change:  
631 "The cell is to be studied longitudinally." *Research in Science Education*, 39(1), 131–155.  
632 <https://doi.org/10.1007/s11165-008-9088-7>
- 633 Cotton, D. R. E. (2006). Implementing curriculum guidance on environmental education: The importance of  
634 teachers' beliefs. *Journal of Curriculum Studies*, 38(1), 67–83.  
635 <https://doi.org/10.1080/00220270500038644>
- 636 Cronin-Jones, L. L. (1991). Science teacher beliefs and their influence on curriculum implementation: Two case  
637 studies. *Journal of Research in Science Teaching*, 28(3), 235–250. <https://doi.org/10.1002/tea.3660280305>
- 638 Dawson, V. M., & Venville, G. (2008). Teaching strategies for developing students' argumentation skills about  
639 socioscientific issues in high school genetics. *Research in Science Education*, 40(2), 133–148.  
640 <https://doi.org/10.1007/s11165-008-9104-y>
- 641 Dawson, V., & Taylor, P. (2000). Do adolescents' bioethical decisions differ from those of experts? *Journal of*  
642 *Biological Education*, 34(4), 184–188. <https://doi.org/10.1080/00219266.2000.9655716>
- 643 Finnish National Board of Education (2004). *National Core Curriculum for Upper Secondary Schools*. Helsinki,  
644 Finland: Finnish National Board of Education. Retrieved from  
645 [http://www.oph.fi/download/47678\\_core\\_curricula\\_upper\\_secondary\\_education.pdf](http://www.oph.fi/download/47678_core_curricula_upper_secondary_education.pdf)
- 646 Fuller, F. F. (1969). Concerns of teachers: a developmental conceptualization. *American Educational Research*  
647 *Journal*, 6(2), 207–226. <https://doi.org/10.3102/00028312006002207>
- 648 Gess-Newsome, J., & Lederman, N. G. (1995). Biology teachers' perceptions of subject matter structure and its

## HOW DO TEACHERS CHOOSE CONTENT FOR TEACHING?

- 649 relationship to classroom practice. *Journal of Research in Science Teaching*, 32(3), 301–325.  
650 <https://doi.org/10.1002/tea.3660320309>
- 651 Gray, D. S., & Bryce, T. (2006). Socio-scientific issues in science education: Implications for the professional  
652 development of teachers. *Cambridge Journal of Education*, 36(2), 171–192.  
653 <https://doi.org/10.1080/03057640600718489>
- 654 Hand, M., & Levinson, R. (2012). Discussing controversial issues in the classroom. *Educational Philosophy and  
655 Theory*, 44(6), 614–629. <https://doi.org/10.1111/j.1469-5812.2010.00732.x>
- 656 Haney, J. J., Czerniak, C. M., & Lumpe, A. T. (1996). Teacher beliefs and intentions regarding the  
657 implementation of science education reform strands. *Journal of Research in Science Teaching*, 33(9), 971–  
658 993. [https://doi.org/10.1002/\(SICI\)1098-2736\(199611\)33:9<971::AID-TEA2>3.0.CO;2-S](https://doi.org/10.1002/(SICI)1098-2736(199611)33:9<971::AID-TEA2>3.0.CO;2-S)
- 659 Hargreaves, A., Lieberman, A., Fullan, M., & Hopkins, D. (Eds.). (2010). *Second International Handbook of  
660 Educational Change. Part I*. London, UK: Springer.
- 661 Hashweh, M. Z. (1987). Effects of subject-matter knowledge in the teaching of biology and physics. *Teaching  
662 and Teacher Education*, 3(2), 109–120. [https://doi.org/10.1016/0742-051X\(87\)90012-6](https://doi.org/10.1016/0742-051X(87)90012-6)
- 663 Hashweh, M. Z. (2005). Teacher pedagogical constructions: A reconfiguration of pedagogical content  
664 knowledge. *Teachers and Teaching: Theory and Practice*, 11(3), 273–292.  
665 <https://doi.org/10.1080/13450600500105502>
- 666 Henze, I., Van Driel, J., & Verloop, N. (2007). The change of science teachers' personal knowledge about  
667 teaching models and modelling in the context of science education reform. *International Journal of  
668 Science Education*, 29(15), 1819–1846. <https://doi.org/10.1080/09500690601052628>
- 669 Hess, D. (2008). Controversial issues and democratic discourse. In L. S. Levstik & C. A. Tyson (Eds.),  
670 *Handbook of Research in Social Studies Education* (pp. 124–136).
- 671 Hofstein, A., Eilks, I., & Bybee, R. (2011). Societal issues and their importance for contemporary science  
672 education—a pedagogical justification and the state-of-the-art in Israel, Germany, and the USA.  
673 *International Journal of Science and Mathematics Education*, 9(6), 1459–1483.  
674 <https://doi.org/10.1007/s10763-010-9273-9>
- 675 Huang, R. (2017). RQDA: R-based Qualitative Data Analysis. Retrieved from <http://rqda.r-forge.r-project.org>
- 676 Käpylä, M., Heikkinen, J., & Asunta, T. (2009). Influence of content knowledge on pedagogical content  
677 knowledge: The case of teaching photosynthesis and plant growth. *International Journal of Science  
678 Education*, 31(10), 1395–1415. <https://doi.org/10.1080/09500690802082168>
- 679 Kuş, Z. (2015). Science and social studies teachers' beliefs and practices about teaching controversial issues:  
680 Certain comparisons. *Journal of Social Science Education*, 14(3), 84–97. [https://doi.org/10.2390/jsse-v14-  
681 i3-1385](https://doi.org/10.2390/jsse-v14-i3-1385)
- 682 Lazarowitz, R., & Bloch, I. (2005). Awareness of societal issues among high school biology teachers teaching  
683 genetics. *Journal of Science Education and Technology*, 14(5–6), 437–457.  
684 <https://doi.org/10.1007/s10956-005-0220-4>
- 685 Lederman, N. G., & Abell, S. K. (2014). *Handbook of research on science education. Volume II*. New York,  
686 USA: Routledge.
- 687 Lederman, N. G., Antink, A., & Bartos, S. (2014). Nature of Science, Scientific Inquiry, and Socio-Scientific  
688 Issues arising from genetics: A pathway to developing a scientifically literate citizenry. *Science and  
689 Education*, 23(2), 285–302. <https://doi.org/10.1007/s11191-012-9503-3>
- 690 Lee, H., Abd-El-Khalick, F., & Choi, K. (2006). Korean science teachers' perceptions of the introduction of  
691 socio-scientific issues into the science curriculum. *Canadian Journal of Science, Mathematics and  
692 Technology Education*, 6(2), 97–117. <https://doi.org/10.1080/14926150609556691>
- 693 Leonard, B. (2010). Controversial issues in biology education? You bet! Here are some. *The American Biology  
694 Teacher*, 72(7), 407–407. <https://doi.org/10.1525/abt.2010.72.7.3>

## HOW DO TEACHERS CHOOSE CONTENT FOR TEACHING?

- 695 Levin, F. S., & Lindbeck, J. S. (1979). An analysis of selected biology textbooks for the treatment of  
696 controversial issues and biosocial problems. *Journal of Research in Science Teaching*, 16(3), 199–203.  
697 <https://doi.org/10.1002/tea.3660160304>
- 698 Lewis, J., & Leach, J. (2006). Discussion of socio-scientific issues: The role of science knowledge. *International*  
699 *Journal of Science Education*, 28(11), 1267–1287. <https://doi.org/10.1080/09500690500439348>
- 700 Loewenberg Ball, D., Feiman-Nemser, S., Ball, D. L., & Feiman-Nemser, S. (1988). Using textbooks and  
701 teachers' guides: A dilemma for beginning teachers and teacher educators. *Curriculum Inquiry*, 18(4),  
702 401–423. <https://doi.org/10.1080/03626784.1988.11076050>
- 703 Lynagh, M., Gilligan, C., & Handley, T. (2010). Teaching about, and dealing with, sensitive issues in schools:  
704 How confident are pre-service teachers? *Asia-Pacific Journal of Health, Sport and Physical Education*,  
705 1(3–4), 5–11. <https://doi.org/10.1080/18377122.2010.9730332>
- 706 Magnusson, S., Krajcik, J., & Borko, H. (1999). Nature, sources, and development of pedagogical content  
707 knowledge for science teaching. *Examining Pedagogical Content Knowledge*, 95–132.  
708 [https://doi.org/10.1007/0-306-47217-1\\_4](https://doi.org/10.1007/0-306-47217-1_4)
- 709 Morrow, S. L. (2005). Quality and trustworthiness in qualitative research in counseling psychology. *Journal of*  
710 *Counseling Psychology*, 52(2), 250–260. <https://doi.org/10.1037/0022-0167.52.2.250>
- 711 Newton, P., Driver, R., & Osborne, J. (1999). The place of argumentation in the pedagogy of school science.  
712 *International Journal of Science Education*, 21(5), 553–576. <https://doi.org/10.1080/095006999290570>
- 713 Niemi, H., Toom, A., & Kallioniemi, A. (2012). *Miracle of Education. The Principles and Practices of Teaching*  
714 *and Learning in Finnish Schools*. Rotterdam, Netherlands: Sense Publishers.
- 715 Oulton, Chris, Dillon, J., & Grace, M. M. (2004). Reconceptualizing the teaching of controversial issues.  
716 *International Journal of Science Education*, 26(4), 411–423.  
717 <https://doi.org/10.1080/0950069032000072746>
- 718 Oulton, Christopher, Day, V., Dillon, J., & Grace, M. (2004). Controversial issues - Teachers' attitudes and  
719 practices in the context of citizenship education. *Oxford Review of Education*, 30(4), 489–507.  
720 <https://doi.org/10.1080/0305498042000303973>
- 721 Owens, D. C., Sadler, T. D., & Zeidler, D. L. (2017). Controversial issues in the science classroom. *Phi Delta*  
722 *Kappan*, 99(4), 45–49. <https://doi.org/10.1177/0031721717745544>
- 723 Pedretti, E. G., Bencze, L., Hewitt, J., Romkey, L., & Jivraj, A. (2008). Promoting issues-based STSE  
724 perspectives in science teacher education: Problems of identity and ideology. *Science and Education*,  
725 17(8–9), 941–960. <https://doi.org/10.1007/s11191-006-9060-8>
- 726 Phillips, J. P. (1997). *Florida teachers' attitudes toward the study of controversial issues in public high school*  
727 *social studies classrooms*. Florida State University.
- 728 Reiss, M. J. (1999). Teaching ethics in science. *Studies in Science Education*, 34(1), 115–140.  
729 <https://doi.org/10.1080/03057269908560151>
- 730 Remillard, J. T., & Bryans, B. (2004). Teachers' orientations toward mathematics curriculum materials:  
731 Implications for teacher learning. *National Council of Teachers of Mathematics*, 35(5), 352–388.  
732 <https://doi.org/10.2307/30034820>
- 733 Rowling, L. (1996). A comprehensive approach to handling sensitive issues in schools, with special reference to  
734 loss and grief. *Pastoral Care in Education*, 14(1), 17–21. <https://doi.org/10.1080/02643949609470950>
- 735 Sadler, T. D., & Zeidler, D. L. (2004). The morality of socioscientific issues: Construal and resolution of genetic  
736 engineering dilemmas. *Science Education*, 88(1), 4–27. <https://doi.org/10.1002/sce.10101>
- 737 Shawer, S. F. (2017). Teacher-driven curriculum development at the classroom level: Implications for  
738 curriculum, pedagogy and teacher training. *Teaching and Teacher Education*, 63, 296–313.  
739 <https://doi.org/10.1016/j.tate.2016.12.017>
- 740 Spiegel, D. L., & Wright, J. D. (1984). Biology teachers' preferences in textbook characteristics. *Journal of*

## HOW DO TEACHERS CHOOSE CONTENT FOR TEACHING?

- 741            *Reading*, 27(7), 624–628.
- 742        Stewart, J., Cartier, J. L., & Passmore, C. M. (2005). Developing Understanding Through Model-Based Inquiry.  
743            *How Students Learn*, 515–565.
- 744        Team, R. C. (2013). R: A language and environment for statistical computing. Vienna, Austria.: R Foundation  
745            for Statistical Computing. Retrieved from <http://www.r-project.org/>
- 746        Tidemand, S., & Nielsen, J. A. (2017). The role of socioscientific issues in biology teaching: from the  
747            perspective of teachers. *International Journal of Science Education*, 39(1), 44–61.  
748            <https://doi.org/10.1080/09500693.2016.1264644>
- 749        Timmermans, S., & Tavory, I. (2012). Theory construction in qualitative research: From grounded theory to  
750            abductive analysis. *Sociological Theory*, 30(3), 167–186. <https://doi.org/10.1177/0735275112457914>
- 751        Van Driel, J. H., Beijaard, D., & Verloop, N. (2001). Professional development and reform in science education:  
752            The role of teachers' practical knowledge. *Journal of Research in Science Teaching*, 38(2), 137–158.  
753            [https://doi.org/10.1002/1098-2736\(200102\)38:2<137::AID-TEA1001>3.0.CO;2-U](https://doi.org/10.1002/1098-2736(200102)38:2<137::AID-TEA1001>3.0.CO;2-U)
- 754        van Driel, J. H., Bulte, A. M. W., & Verloop, N. (2008). Using the curriculum emphasis concept to investigate  
755            teachers' curricular beliefs in the context of educational reform. *Journal of Curriculum Studies*, 40(1),  
756            107–122. <https://doi.org/10.1080/00220270601078259>
- 757        Wieringa, N., Janssen, F. J. J. M., & van Driel, J. H. (2011). Biology teachers designing context-based lessons  
758            for their classroom practice: The importance of rules-of-thumb. *International Journal of Science*  
759            *Education*, 33(17), 2437–2462. <https://doi.org/10.1080/09500693.2011.553969>
- 760        Zeidler, D. L., Walker, K. A., Ackett, W. A., & Simmons, M. L. (2002). Tangled up in views: Beliefs in the  
761            Nature of science and responses to socioscientific dilemmas. *Science Education*, 86(3), 343–367.  
762            <https://doi.org/10.1002/sce.10025>
- 763

HOW DO TEACHERS CHOOSE CONTENT FOR TEACHING?

764 Table 1: The Core content described in the Finnish national curriculum with selected parts  
765 from courses BI2 and BI5

| Topics         | BI2—Cell and genetics<br><i>Mandatory course</i>                        | BI5—Biotechnology<br><i>Optional course</i>                       |
|----------------|-------------------------------------------------------------------------|-------------------------------------------------------------------|
| DNA and genes  | DNA structure and<br>function<br>Genes and alleles<br>Protein synthesis | DNA, gene and genome<br>structure<br>Gene function and regulation |
| Cell functions | Gametes and meiosis<br>Mitosis                                          |                                                                   |
| Inheritance    | Inheritance mechanisms<br>Population genetics                           |                                                                   |
| Applications   |                                                                         | Gene technology                                                   |
| SSI            |                                                                         | Ethics and legal issues in gene<br>technology                     |

766 Table 2: Summary of interviews of ten interviewed teachers. For details, see the supplemental material.

| Teacher | Gender | Central theme of teaching           | Examples of Human Mendelian traits              | Examples of Complex human traits                | Perceived controversial or sensitive issues | Perceived student interest               | Genetics content emphasis | Teacher concurrence with analysis |
|---------|--------|-------------------------------------|-------------------------------------------------|-------------------------------------------------|---------------------------------------------|------------------------------------------|---------------------------|-----------------------------------|
| A       | Female | Development of phenotype            | Disorders, lactose intolerance                  | Life style diseases                             | None                                        | Artistic talent, epigenetics             | Developmental             | Yes                               |
| B       | Male   | Development of phenotype            | Disorders, blood groups, tongue roll            | Height, skin colour, talent                     | None                                        | Epigenetics, talents, monohybrid crosses | Developmental             | Yes                               |
| C       | Female | Inheritance and continuity          | Disorders                                       | Eye color, <b>generally avoid</b>               | Intelligence                                | Gene tests                               | Hereditary                | Yes                               |
| D       | Male   | Inheritance and continuity          | Disorders                                       | Height, skin colour                             | Human race-related                          | Medical genetics                         | Hereditary                | No answer                         |
| E       | Male   | The structure and function of genes | Eye colors, <b>generally avoid</b>              | Shoe size, <b>generally avoid</b>               | Intelligence                                | Mono- and dihybrid crosses               | Structural                | Yes                               |
| F       | Female | Development of phenotype            | Disorders, tongue roll, widow's peak            | Height                                          | None                                        | Challenging contents                     | Developmental             | No; Structural                    |
| G       | Female | The structure and function of genes | Tongue roll, eye colors, <b>generally avoid</b> | Height, hair coloration, <b>generally avoid</b> | Intelligence, talent, genetic disorders     | Mono- and dihybrid crosses               | Structural                | Yes                               |
| H       | Female | Inheritance and continuity          | Tongue roll, ear lobe                           | Skin color, generally avoid                     | None mentioned                              | Inheritance patterns                     | Hereditary                | Yes                               |
| I       | Male   | Development of phenotype            | Disorders                                       | Stress reaction, intelligence                   | None                                        | Sex-related traits                       | Developmental             | No; Structural                    |
| J       | Female | Development of phenotype            | Disorders, eye colour, ear lobe                 | Height, skin colour                             | Developmental disorders                     | Musicality, own complex traits           | Developmental             | No; Hereditary                    |



Running head: HOW DO TEACHERS CHOOSE CONTENT FOR TEACHING?

767 Table 3: Three different content emphasis and the teacher perceptions and descriptions which  
 768 differ between emphasis.

| <b>Content emphasis</b>           | <b>Structural</b>            | <b>Hereditary</b>              | <b>Developmental</b>              |
|-----------------------------------|------------------------------|--------------------------------|-----------------------------------|
| <i>Central theme</i>              | Gene structure and function  | Continuity of DNA through time | Development of traits             |
| <i>Human context</i>              |                              |                                |                                   |
| 1. Human Mendelian disorders      | Avoid                        | Use as examples                | Use as examples                   |
| 2. Complex human traits           | Avoid                        | If students ask                | Use as examples                   |
| <i>Perceived student interest</i> | Monohybrid, dihybrid crosses | Gene tests, medical genetics   | Epigenetics, complex human traits |

769
